# Supplementary material
Source: PubMed Central journal article supplement (PMC1698875)
Supplement: NIHMS14038-supplement-methods.pdf [file NIHMS14038-supplement-methods.pdf]

Supplemental methods section:

**Electrophysiology *in vitro*:** The pups underwent HT-induced, or bicarbonate-induced seizures, or the HT+CO<sub>2</sub>-treatment at P9-P10. After 5-11 d, the animals were anesthetized, decapitated and the brains removed as described previously<sup>1</sup>. Horizontal hippocampal slices were cut at 300 µm thickness in an ice-cold solution containing (in mM) NaCl 87, sucrose 75, NaHCO<sub>3</sub> 26, KCl 2.5, NaH<sub>2</sub>PO<sub>4</sub> 1.25, CaCl<sub>2</sub> 0.5, MgSO<sub>4</sub> 7, glucose 25, and saturated with 95% O<sub>2</sub>/5% CO<sub>2</sub> and heated to 35 °C for 30 min. All recordings were done at room temperature in a physiological solution containing (in mM) NaCl 119, NaHCO<sub>3</sub> 26, KCl 2.5, NaH<sub>2</sub>PO<sub>4</sub> 1, CaCl<sub>2</sub> 2.5, MgSO<sub>4</sub> 1.3, glucose 10 and equilibrated with 95% O<sub>2</sub> and 5% CO<sub>2</sub>. The recording chamber was mounted on an Olympus microscope equipped for IR-DIC microscopy. Whole-cell recording electrodes were filled with (in mM): K-gluconate 135, Hepes 10, Mg-ATP 2, KCl 20, EGTA 0.2; pH was adjusted to 7.2 using KOH. Excitatory and inhibitory synaptic responses were blocked with 1 µM 2,3-Dioxo-6-nitro-1,2,3,4-tetrahydrobenzo[f]quinoxaline-7-sulfonamide (NBQX) and 1 µM 6-imino-3-(4-methoxyphenyl)-1(6*H*)-pyridazinebutanoic acid hydrobromide (SR 95531; Gabazine) (Tocris Cookson). After the whole-cell configuration was established, we monitored holding current and series resistance for at least 5 minutes before switching to current-clamp mode. Holding potential was -60 mV (**Fig 3a<sub>1</sub>,b<sub>1</sub>**) or -55mV (**Fig 3a<sub>2</sub>,b<sub>2</sub>**).

**Western blotting.** Rats were decapitated 1, 2, 3, 5, 10 and 120 days after induction of HT-seizures or the HT+CO<sub>2</sub> treatment, and 5 days after bicarbonate seizures or the bicarbonate+CO<sub>2</sub> treatment. The hippocampi were rapidly dissected out and homogenized in 200 µl lysis buffer containing 0.3 M sucrose, 10 mM HEPES, 1 mM EDTA, pH 6.8. The protein concentrations were determined using D<sub>C</sub> Protein Assay kit (Bio-Rad). Protein samples (50 µg) were separated using 7.5 % sodium dodecyl sulphate-polyacrylamide electrophoresis gel and transferred onto Hybond ECL nitrocellulose membrane (Amersham, Pharmacia Biotech). Western blot analysis was performed in an experiment-blind manner using a rabbit antibody raised against the C terminus of the rat CB1 protein<sup>2</sup>. Blots were probed with the antibody at 1:5000 dilution and developed using ECL-plus (Amersham, Pharmacia Biotech, UK) on x-ray films. Optical densities of the bands were analyzed with the AIDA imaging software (Raytest).

Reference List

1. Schmitz, D., Mellor, J., Breustedt, J., & Nicoll, R. A. Presynaptic kainate receptors impart an associative property to hippocampal mossy fiber long-term potentiation. *Nat. Neurosci.* **6**, 1058-1063 (2003).
2. Hajos, N. *et al.* Cannabinoids inhibit hippocampal GABAergic transmission and network oscillations. *Eur. J Neurosci.* **12**, 3239-3249 (2000).
